# Supplementary material for: Analysis of in vivo single cell behavior by high throughput, human-in-the-loop segmentation of three-dimensional images
Source: PubMed Central journal article supplement (PMC4659165; doi:10.1186/s12859-015-0814-7), 2015-11-25
Supplement: 12859_2015_814_MOESM2_ESM.pdf [file 12859_2015_814_MOESM2_ESM.pdf]

## Additional tables

| Condition                   | Average precision (AP) | Number of cells |
|-----------------------------|------------------------|-----------------|
| <i>fog-2</i> starved 5 days | 100.00%                | 182             |
| N2 #1                       | 100.00%                | 385             |
| <i>cye-1/+</i>              | 99.97%                 | 513             |
| <i>fog-2</i>                | 99.62%                 | 372             |
| <i>fog-2</i> mated          | 99.56%                 | 276             |
| <i>fog-1</i>                | 99.39%                 | 335             |
| N2 L4 + 3 days #1           | 98.97%                 | 481             |
| L4 N2                       | 98.78%                 | 248             |
| N2 L4 + 3 days #2           | 98.75%                 | 397             |
| N2 #2                       | 98.69%                 | 10999           |
| <i>gld-1::gfp</i>           | 96.54%                 | 4624            |
| <i>inx-22; fog-2</i>        | 93.91%                 | 427             |

**Additional Table 1. Average precision of cell detection over a variety of experimental conditions.** Overall average precision across twelve replicates was 98.7%  $\pm$  2%. Unless otherwise stated, worms were not mated and were fixed at last larval stage (L4) + 1 day. N2 is wildtype.

| Sample            | Average precision (AP) | Number of cells |
|-------------------|------------------------|-----------------|
| N2 gonadal arm #1 | 98.22%                 | 1018            |
| N2 gonadal arm #2 | 96.70%                 | 1071            |
| N2 gonadal arm #3 | 93.94%                 | 1243            |
| N2 gonadal arm #4 | 93.92%                 | 1053            |
| N2 gonadal arm #5 | 92.71%                 | 990             |
| N2 gonadal arm #6 | 88.12%                 | 957             |
| N2 gonadal arm #7 | 70.56%                 | 1284            |

**Additional Table 2. Average precision of cell detection over the whole worm gonadal arms.** Overall average precision is 90.6% ± 9%.

| Segmentation method | Guide image quality | Noise ( $\mu\text{m}$ ) | Average overlap (AO) | AO Confidence interval (95%) |
|---------------------|---------------------|-------------------------|----------------------|------------------------------|
| Active contour      | High                | 0                       | 0.62                 | 0.61 - 0.62                  |
| Watershed           | High                | 0                       | 0.53                 | 0.52 - 0.54                  |
| Voronoi             | High                | 0                       | 0.61                 | 0.61 - 0.62                  |
| Active contour      | Low                 | 0                       | 0.57                 | 0.57 - 0.58                  |
| Watershed           | Low                 | 0                       | 0.13                 | 0.12 - 0.14                  |
| Voronoi             | Low                 | 0                       | 0.61                 | 0.61 - 0.62                  |
| Active contour      | High                | 1                       | 0.60                 | 0.59 - 0.60                  |
| Watershed           | High                | 1                       | 0.48                 | 0.47 - 0.50                  |
| Voronoi             | High                | 1                       | 0.57                 | 0.57 - 0.58                  |
| Active contour      | High                | 1                       | 0.51                 | 0.50 - 0.52                  |
| Watershed           | High                | 1                       | 0.33                 | 0.31 - 0.34                  |
| Voronoi             | High                | 1                       | 0.45                 | 0.44 - 0.45                  |

**Additional Table 3. Average overlap of cell segmentations across different experimental conditions.** Active contours performs better than marker-controlled watershed when membrane signal is poor quality, and active contours performs better than truncated Voronoi when cell detections are not perfectly centered.

| MZ sample | True positives | True negatives | False positives | False negatives | Sensitivity | Specificity | Processed cells |
|-----------|----------------|----------------|-----------------|-----------------|-------------|-------------|-----------------|
| 1         | 76             | 21             | 9               | 2               | 0.974       | 0.700       | 108             |
| 2         | 66             | 47             | 6               | 20              | 0.767       | 0.887       | 139             |
| 3         | 68             | 20             | 1               | 7               | 0.907       | 0.952       | 96              |
| Aggregate | 210            | 88             | 16              | 29              | 0.879       | 0.846       | 343             |

**Additional Table 4. Benchmarking EdU quantification accuracy.** Samples 1, 2, and 3 are representative of the range of EdU staining quality observed in all samples.

| Software | AO           | Precision   | Recall     |
|----------|--------------|-------------|------------|
| Parismi  | 0.60 ± 0.015 | 97% ± 0.73% | 93% ± 5.6% |
| Imaris   | 0.37 ± 0.047 | 84% ± 3.5%  | 82% ± 3.6% |
| Vaa3D    | 0.31 ± 0.046 | 92% ± 1.5%  | 72% ± 3.7% |
| Ilastik  | 0.31 ± 0.006 | 89% ± 5.7%  | 61% ± 12%  |
| MINS     | 0.30 ± 0.04  | 90% ± 1.4   | 77% ± 3.4% |

**Additional Table 5. Performance comparisons with other software.** Performance assayed using as ground truth the same three hand-segmented *C. elegans* MZ stacks as example in Additional Figure 4 (standard deviation computed across the three stacks).

| Software | User 1 ground truth            | User 2 ground truth             | User 3 ground truth             |
|----------|--------------------------------|---------------------------------|---------------------------------|
| Parismi  | AO = 0.57,<br>P = 99%, R = 99% | AO = 0.65,<br>P = 95%, R = 100% | AO = 0.60,<br>P = 99%, R = 100% |
| Imaris   | AO = 0.52,<br>P = 96%, R = 67% | AO = 0.52,<br>P = 96%, R = 70%  | AO = 0.59,<br>P = 96%, R = 68%  |
| Vaa3D    | AO = 0.36,<br>P = 91%, R = 83% | AO = 0.34,<br>P = 91%, R = 87%  | AO = 0.34,<br>P = 91%, R = 84%  |
| Ilastik  | AO = 0.36,<br>P = 91%, R = 41% | AO = 0.39,<br>P = 91%, R = 44%  | AO = 0.35,<br>P = 91%, R = 42%  |
| MINS     | AO = 0.40,<br>P = 91%, R = 83% | AO = 0.34,<br>P = 91%, R = 87%  | AO = 0.37,<br>P = 91%, R = 84%  |

**Additional Table 6. Performance scored following ground truths provided by different users.** AO: average overlap; P: precision; R: recall.

| Cell cycle phase | Number of components | 95% CI    |
|------------------|----------------------|-----------|
| G1               | 3.54                 | 1.00-7.20 |
| S                | 2.71                 | 1.00-7.00 |
| G2               | 3.67                 | 1.00-8.00 |
| M                | 1.90                 | 1.00-5.00 |

**Additional Table 7. Number of connected components of DNA image in G1-, S-, G2-, and M-phase cells.** The number of connected components is calculated by thresholding DNA fluorescence content and counting the number of connected components.

| Cell cycle phase | G1 | S        | G2       | M         |
|------------------|----|----------|----------|-----------|
| G1               | -  | 9.70E-13 | 1.90E+00 | 4.40E-47  |
| S                | -  | -        | 1.80E-33 | 1.60E-51  |
| G2               | -  | -        | -        | 7.60E-100 |
| M                | -  | -        | -        | -         |

**Additional Table 8. Pairwise comparisons of number of connected components in DNA images.** Table shows pairwise rank sum p-values with Bonferroni correction.

| Cell cycle phase | Spatial extent of DNA signal ( $\mu\text{m}^2$ ) | 95% CI      |
|------------------|--------------------------------------------------|-------------|
| G1               | 3.31                                             | 2.14 - 4.83 |
| S                | 3.92                                             | 2.61 - 5.30 |
| G2               | 4.17                                             | 2.87 - 5.70 |
| M                | 3.96                                             | 2.10 - 6.20 |

**Additional Table 9. DNA spatial extent in G1-, S-, G2-, and M phase cells.** The spatial extent is calculated by thresholding DNA fluorescence content and computing the area of the foreground mask.

| Cell cycle phase | G1 | S        | G2       | M        |
|------------------|----|----------|----------|----------|
| G1               | -  | 3.10E-35 | 3.50E-48 | 1.10E-20 |
| S                | -  | -        | 1.40E-14 | 3.90E+00 |
| G2               | -  | -        | -        | 2.40E-07 |
| M                | -  | -        | -        | -        |

**Additional Table 10. Pairwise comparisons of DNA spatial extent in G1-, S-, G2-, and M-phase cells.** Table shows pairwise rank sum p-values with Bonferroni correction.

| Cell cycle phase | Sensitivity | Sensitivity 95% CI | Specificity | Specificity 95% CI |
|------------------|-------------|--------------------|-------------|--------------------|
| G1               | 0.66        | 0.57 - 0.75        | 0.67        | 0.61 - 0.72        |
| S                | 0.73        | 0.69 - 0.76        | 0.67        | 0.63 - 0.70        |
| G2               | 0.76        | 0.70 - 0.81        | 0.74        | 0.71 - 0.76        |
| M                | 0.71        | 0.68 - 0.75        | 0.84        | 0.82 - 0.87        |

**Additional Table 11. Sensitivity and specificity of classifier.** All binary classifiers have sensitivity and specificity above 66%.
