# Supplementary material for: Analysis of in vivo single cell behavior by high throughput, human-in-the-loop segmentation of three-dimensional images
Source: PubMed Central journal article supplement (PMC4659165; doi:10.1186/s12859-015-0814-7), 2015-11-25

Additional Figure 8

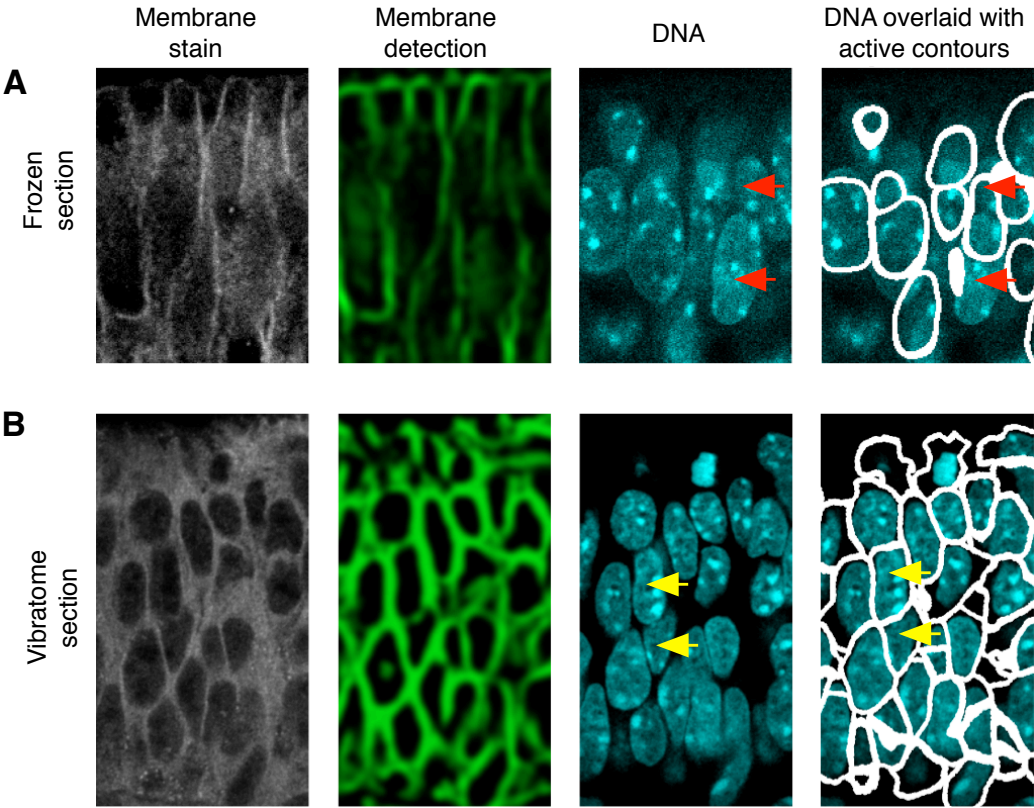

Supplement: 12859_2015_814_MOESM10_ESM.pdf [file 12859_2015_814_MOESM10_ESM.pdf]
